# Supplementary material for: Molecular recognition of a membrane-anchored HIV-1 pan-neutralizing epitope
Source: PubMed Central journal article supplement (PMC9674588; doi:10.1038/s42003-022-04219-6), 2022-11-18
Supplement: 42003_2022_4219_MOESM2_ESM.pdf [file 42003_2022_4219_MOESM2_ESM.pdf]

## Description of Additional Supplementary Files

**File name:** Supplementary Data 1

**Description:** The source data behind the graphs in the paper
